# Supplementary material for: Model-based cost-effectiveness analysis of a multiplex lateral flow rapid diagnostic test for acute non-malarial febrile illness in rural South and Southeast Asian primary care
Source: bioRxiv or medRxiv preprint supplement (doi:10.1101/2023.10.28.23297707), 2023-10-29
Supplement: Supplementary file [file media-1.pdf]

## Supporting Information S1

### RECOMMENDED INTERPRETATION AND MANAGEMENT FOR POSITIVE TESTS

| Positive multiplex LF-RDT component | Recommended interpretation                                                                                                                           | Recommended management                                                           |
|-------------------------------------|------------------------------------------------------------------------------------------------------------------------------------------------------|----------------------------------------------------------------------------------|
| Dengue                              | Patient has dengue                                                                                                                                   | Referral to hospital for admission                                               |
| Enteric fever                       | Patient has enteric fever                                                                                                                            | Ciprofloxacin                                                                    |
| CRP (>40 mg/L)                      | Patient has a bacterial infection (not enteric fever if enteric fever test is negative, otherwise enteric fever if enteric fever test also positive) | Amoxicillin unless enteric fever test also positive, in which case ciprofloxacin |
| None                                | Patient has a viral infection                                                                                                                        | No antibiotics                                                                   |

# CAMBODIA

## Model Settings

Reset all model inputs

Introduction

Settings

Results

SA Settings

DSA Results

PSA Results

### Model settings

Time horizon  
DSA/PSA default variation  
Number of PSA iterations  
Willingness-to-pay threshold  
**Note: Adjust if changing country**  
Perspective  
Country

Lifetime

20.00%

1,000

\$357

Societal

Cambodia

*Woods et al. Inflated to 2022 values - Bangladesh: 51-723 (avg 388). Cambodia: 56-658 (avg 357). Original values - Bangladesh: 30-427 (avg 229). Cambodia: 44-518 (avg 281). 2013 data.*

### Population characteristics

|                                   | Value  | Source                                                                   |
|-----------------------------------|--------|--------------------------------------------------------------------------|
| Average age                       | 28     | SEACTN data (21/03/2022-21/03/2023 - Bangladesh: 28.34 ;Cambodia: 34.21) |
| Proportion of adults              | 79.05% | SEACTN data (21/03/2022-21/03/2023)                                      |
| Proportion of children 5-15 years | 17.14% | SEACTN data (21/03/2022-21/03/2023)                                      |
| Proportion of children <5 years   | 3.81%  | SEACTN data (21/03/2022-21/03/2023)                                      |

### Scenario analysis inputs (in place of the above)

#### Fever of unknown source

|                                   |        |                                     |
|-----------------------------------|--------|-------------------------------------|
| Proportion of adults              | 82.84% | SEACTN data (21/03/2022-21/03/2023) |
| Proportion of children 5-15 years | 13.64% | SEACTN data (21/03/2022-21/03/2023) |
| Proportion of children <5 years   | 3.52%  | SEACTN data (21/03/2022-21/03/2023) |

# Decision Tree

Introduction

Settings

Results

SA Settings

DSA Results

PSA Results

## Decision tree calculations

**Intervention:** Clinical assessment only

| Branch | True disease          | Diagnosis       | Outcome                            | Probability    | Diagnostic costs | Hospitalisation costs | Treatment costs | Societal costs | Total costs   | YLD           | YLL           | DALYs         |
|--------|-----------------------|-----------------|------------------------------------|----------------|------------------|-----------------------|-----------------|----------------|---------------|---------------|---------------|---------------|
| 1      | Enteric fever         | Enteric fever   | Survive                            | 1.27%          | \$0.00           | \$0.23                | \$0.02          | \$0.06         | <b>\$0.31</b> | 0.0094        | 0.0000        | <b>0.0094</b> |
| 2      | Enteric fever         | Enteric fever   | Die                                | 0.01%          | \$0.00           | \$0.00                | \$0.00          | \$0.00         | <b>\$0.00</b> | 0.0001        | 0.0038        | <b>0.0039</b> |
| 3      | Enteric fever         | Other           | Survive                            | 1.26%          | \$0.00           | \$0.37                | \$0.03          | \$0.02         | <b>\$0.42</b> | 0.0098        | 0.0000        | <b>0.0098</b> |
| 4      | Enteric fever         | Other           | Die                                | 0.01%          | \$0.00           | \$0.00                | \$0.00          | \$0.00         | <b>\$0.00</b> | 0.0001        | 0.0051        | <b>0.0052</b> |
| 5      | Dengue                | Dengue          | Survive - observed in hospital     | 11.56%         | \$0.00           | \$1.20                | \$0.00          | \$0.00         | <b>\$1.20</b> | 0.0000        | 0.0000        | <b>0.0000</b> |
| 6      | Dengue                | Other           | Survive - not observed in hospital | 0.87%          | \$0.00           | \$0.00                | \$0.00          | \$0.00         | <b>\$0.00</b> | 0.0000        | 0.0000        | <b>0.0000</b> |
| 7      | Other viral           | Enteric fever   | Survive                            | 17.28%         | \$0.00           | \$1.19                | \$0.29          | \$0.80         | <b>\$2.28</b> | 0.0000        | 0.0000        | <b>0.0000</b> |
| 8      | Other viral           | Dengue          | Survive                            | 47.69%         | \$0.00           | \$4.94                | \$0.00          | \$0.00         | <b>\$4.94</b> | 0.0000        | 0.0000        | <b>0.0000</b> |
| 9      | Other viral           | Other bacterial | Survive - antibiotic prescribed    | 1.79%          | \$0.00           | \$0.00                | \$0.06          | \$0.04         | <b>\$0.10</b> | 0.0000        | 0.0000        | <b>0.0000</b> |
| 10     | Other viral           | Other viral     | Survive - no antibiotic prescribed | 2.36%          | \$0.00           | \$0.00                | \$0.00          | \$0.00         | <b>\$0.00</b> | 0.0000        | 0.0000        | <b>0.0000</b> |
| 11     | Other bacterial cause | Other bacterial | Survive - antibiotic prescribed    | 11.16%         | \$0.00           | \$0.00                | \$0.37          | \$0.28         | <b>\$0.64</b> | 0.0000        | 0.0000        | <b>0.0000</b> |
| 12     | Other bacterial cause | Other viral     | Survive - no antibiotic prescribed | 4.74%          | \$0.00           | \$0.00                | \$0.00          | \$0.00         | <b>\$0.00</b> | 0.0000        | 0.0000        | <b>0.0000</b> |
|        |                       |                 |                                    | <b>100.00%</b> | <b>\$0.00</b>    | <b>\$7.93</b>         | <b>\$0.76</b>   | <b>\$1.21</b>  | <b>\$9.90</b> | <b>0.0194</b> | <b>0.0089</b> | <b>0.0282</b> |

Percentage receiving antibiotics 31.51%  
Inappropriate antibiotics 20.02%

**Intervention:** Novel multiplex + clinical assessment

| Branch | True disease          | Diagnosis       | Outcome                            | Probability    | Diagnostic costs | Hospitalisation costs | Treatment costs | Societal costs | Total costs   | YLD           | YLL           | DALYs         |
|--------|-----------------------|-----------------|------------------------------------|----------------|------------------|-----------------------|-----------------|----------------|---------------|---------------|---------------|---------------|
| 1      | Enteric fever         | Enteric fever   | Survive                            | 2.15%          | \$0.11           | \$0.39                | \$0.04          | \$0.10         | <b>\$0.63</b> | 0.0160        | 0.0000        | <b>0.0160</b> |
| 2      | Enteric fever         | Enteric fever   | Die                                | 0.02%          | \$0.00           | \$0.00                | \$0.00          | \$0.00         | <b>\$0.00</b> | 0.0001        | 0.0065        | <b>0.0066</b> |
| 3      | Enteric fever         | Other           | Survive                            | 0.38%          | \$0.02           | \$0.11                | \$0.01          | \$0.01         | <b>\$0.15</b> | 0.0029        | 0.0000        | <b>0.0029</b> |
| 4      | Enteric fever         | Other           | Die                                | 0.00%          | \$0.00           | \$0.00                | \$0.00          | \$0.00         | <b>\$0.00</b> | 0.0000        | 0.0015        | <b>0.0016</b> |
| 5      | Dengue                | Dengue          | Survive - observed in hospital     | 10.56%         | \$0.53           | \$1.09                | \$0.00          | \$0.00         | <b>\$1.62</b> | 0.0000        | 0.0000        | <b>0.0000</b> |
| 6      | Dengue                | Other           | Survive - not observed in hospital | 1.86%          | \$0.09           | \$0.00                | \$0.00          | \$0.00         | <b>\$0.09</b> | 0.0000        | 0.0000        | <b>0.0000</b> |
| 7      | Other viral           | Enteric fever   | Survive                            | 3.46%          | \$0.17           | \$0.24                | \$0.06          | \$0.16         | <b>\$0.63</b> | 0.0000        | 0.0000        | <b>0.0000</b> |
| 8      | Other viral           | Dengue          | Survive                            | 3.46%          | \$0.17           | \$0.36                | \$0.00          | \$0.00         | <b>\$0.53</b> | 0.0000        | 0.0000        | <b>0.0000</b> |
| 9      | Other viral           | Other bacterial | Survive - antibiotic prescribed    | 9.95%          | \$0.50           | \$0.00                | \$0.33          | \$0.25         | <b>\$1.07</b> | 0.0000        | 0.0000        | <b>0.0000</b> |
| 10     | Other viral           | Other viral     | Survive - no antibiotic prescribed | 52.25%         | \$2.61           | \$0.00                | \$0.00          | \$0.00         | <b>\$2.61</b> | 0.0000        | 0.0000        | <b>0.0000</b> |
| 11     | Other bacterial cause | Other bacterial | Survive - antibiotic prescribed    | 11.77%         | \$0.59           | \$0.00                | \$0.39          | \$0.29         | <b>\$1.27</b> | 0.0000        | 0.0000        | <b>0.0000</b> |
| 12     | Other bacterial cause | Other viral     | Survive - no antibiotic prescribed | 4.13%          | \$0.21           | \$0.00                | \$0.00          | \$0.00         | <b>\$0.21</b> | 0.0000        | 0.0000        | <b>0.0000</b> |
|        |                       |                 |                                    | <b>100.00%</b> | <b>\$5.00</b>    | <b>\$2.20</b>         | <b>\$0.81</b>   | <b>\$0.81</b>  | <b>\$8.82</b> | <b>0.0191</b> | <b>0.0080</b> | <b>0.0271</b> |

Percentage receiving antibiotics 27.34%  
Inappropriate antibiotics 13.69%

# Model Results

Introduction

Settings

Results

SA Settings

DSA Results

PSA Results

## Cost-Effectiveness Results

|                     | Diagnostic costs | Hospitalisation costs | Treatment costs | Societal costs | Total Costs   | YLD    | YLL    | DALYs         | % of cases correctly diagnosed | % of patients prescribed antibiotics |
|---------------------|------------------|-----------------------|-----------------|----------------|---------------|--------|--------|---------------|--------------------------------|--------------------------------------|
| Clinical assessment | \$0.00           | \$7.93                | \$0.76          | \$1.21         | <b>\$9.90</b> | 0.0194 | 0.0089 | <b>0.0282</b> | 32.88%                         | 31.51%                               |
| Multiplex LF-RDT    | \$5.00           | \$2.20                | \$0.81          | \$0.81         | <b>\$8.82</b> | 0.0191 | 0.0080 | <b>0.0271</b> | 90.84%                         | 27.34%                               |

## Incremental Results

|                                          | Diagnostic costs | Hospitalisation costs | Treatment costs | Societal costs | Total Costs    | YLD    | YLL    | DALYs averted | % of cases correctly diagnosed | % of patients prescribed antibiotics | ICER (\$/DALY averted) |
|------------------------------------------|------------------|-----------------------|-----------------|----------------|----------------|--------|--------|---------------|--------------------------------|--------------------------------------|------------------------|
| Multiplex LF-RDT vs. Clinical assessment | \$5.00           | -\$5.74               | \$0.05          | -\$0.40        | <b>-\$1.08</b> | 0.0003 | 0.0009 | <b>0.0012</b> | 57.96%                         | -4.16%                               | -\$940.95              |

I

# Scenario Analyses

Run Scenario

Introduction

Settings

Results

SA Settings

DSA Results

PSA Results

## Sensitivity and Specificity Scenario Analyses

| Dengue multiplex |             |        |                                |
|------------------|-------------|--------|--------------------------------|
| Sensitivity      | Specificity | NMB    | Threshold cost-effective price |
| 0.9              | 0.6         | \$1.42 | \$6.42                         |
| 0.8              | 0.7         | \$2.05 | \$7.05                         |
| 0.7              | 0.8         | \$2.69 | \$7.69                         |
| 0.6              | 0.9         | \$3.33 | \$8.33                         |

NMB \$1.49

| Enteric fever multiplex |             |         |                                |
|-------------------------|-------------|---------|--------------------------------|
| Sensitivity             | Specificity | NMB     | Threshold cost-effective price |
| 0.9                     | 0.6         | -\$5.08 | -\$0.08                        |
| 0.8                     | 0.7         | -\$2.71 | \$2.29                         |
| 0.7                     | 0.8         | -\$0.34 | \$4.66                         |
| 0.6                     | 0.9         | \$2.03  | \$7.03                         |

| CRP multiplex |             |         |                                |
|---------------|-------------|---------|--------------------------------|
| Sensitivity   | Specificity | NMB     | Threshold cost-effective price |
| 0.9           | 0.6         | -\$0.04 | \$4.96                         |
| 0.8           | 0.7         | \$1.44  | \$6.44                         |
| 0.7           | 0.8         | \$2.91  | \$7.91                         |
| 0.6           | 0.9         | \$4.39  | \$9.39                         |

| All 3 tests |             |         |                                |
|-------------|-------------|---------|--------------------------------|
| Sensitivity | Specificity | NMB     | Threshold cost-effective price |
| 0.9         | 0.6         | -\$8.03 | -\$3.03                        |
| 0.8         | 0.7         | -\$4.83 | \$0.17                         |
| 0.7         | 0.8         | -\$1.09 | \$3.91                         |
| 0.6         | 0.9         | \$3.17  | \$8.17                         |

# BANGLADESH

## Model Settings

Reset all model inputs

Introduction

Settings

Results

SA Settings

DSA Results

PSA Results

### Model settings

Time horizon  
DSA/PSA default variation  
Number of PSA iterations  
Willingness-to-pay threshold  
**Note: Adjust if changing country**  
Perspective  
Country

Lifetime

20.00%

1,000

\$388

Societal

Bangladesh

*Woods et al. Inflated to 2022 values - Bangladesh: 51-723 (avg 388). Cambodia: 56-658 (avg 357). Original values - Bangladesh: 30-427 (avg 229). Cambodia: 44-518 (avg 281). 2013 data.*

### Population characteristics

|                                   | Value  | Source                                                                   |
|-----------------------------------|--------|--------------------------------------------------------------------------|
| Average age                       | 28     | SEACTN data (21/03/2022-21/03/2023 - Bangladesh: 28.34 ;Cambodia: 34.21) |
| Proportion of adults              | 79.05% | SEACTN data (21/03/2022-21/03/2023)                                      |
| Proportion of children 5-15 years | 17.14% | SEACTN data (21/03/2022-21/03/2023)                                      |
| Proportion of children <5 years   | 3.81%  | SEACTN data (21/03/2022-21/03/2023)                                      |

### Scenario analysis inputs (in place of the above)

#### Fever of unknown source

|                                   |        |                                     |
|-----------------------------------|--------|-------------------------------------|
| Proportion of adults              | 82.84% | SEACTN data (21/03/2022-21/03/2023) |
| Proportion of children 5-15 years | 13.64% | SEACTN data (21/03/2022-21/03/2023) |
| Proportion of children <5 years   | 3.52%  | SEACTN data (21/03/2022-21/03/2023) |

# Decision Tree

Introduction

Settings

Results

SA Settings

DSA Results

PSA Results

## Decision tree calculations

**Intervention:** Clinical assessment only

| Branch | True disease          | Diagnosis       | Outcome                            | Probability    | Diagnostic costs | Hospitalisation costs | Treatment costs | Societal costs | Total costs   | YLD           | YLL           | DALYs         |
|--------|-----------------------|-----------------|------------------------------------|----------------|------------------|-----------------------|-----------------|----------------|---------------|---------------|---------------|---------------|
| 1      | Enteric fever         | Enteric fever   | Survive                            | 1.27%          | \$0.00           | \$0.23                | \$0.02          | \$0.06         | <b>\$0.31</b> | 0.0094        | 0.0000        | <b>0.0094</b> |
| 2      | Enteric fever         | Enteric fever   | Die                                | 0.01%          | \$0.00           | \$0.00                | \$0.00          | \$0.00         | <b>\$0.00</b> | 0.0001        | 0.0038        | <b>0.0039</b> |
| 3      | Enteric fever         | Other           | Survive                            | 1.26%          | \$0.00           | \$0.37                | \$0.03          | \$0.02         | <b>\$0.42</b> | 0.0098        | 0.0000        | <b>0.0098</b> |
| 4      | Enteric fever         | Other           | Die                                | 0.01%          | \$0.00           | \$0.00                | \$0.00          | \$0.00         | <b>\$0.00</b> | 0.0001        | 0.0051        | <b>0.0052</b> |
| 5      | Dengue                | Dengue          | Survive - observed in hospital     | 11.56%         | \$0.00           | \$1.20                | \$0.00          | \$0.00         | <b>\$1.20</b> | 0.0000        | 0.0000        | <b>0.0000</b> |
| 6      | Dengue                | Other           | Survive - not observed in hospital | 0.87%          | \$0.00           | \$0.00                | \$0.00          | \$0.00         | <b>\$0.00</b> | 0.0000        | 0.0000        | <b>0.0000</b> |
| 7      | Other viral           | Enteric fever   | Survive                            | 17.28%         | \$0.00           | \$1.19                | \$0.29          | \$0.80         | <b>\$2.28</b> | 0.0000        | 0.0000        | <b>0.0000</b> |
| 8      | Other viral           | Dengue          | Survive                            | 47.69%         | \$0.00           | \$4.94                | \$0.00          | \$0.00         | <b>\$4.94</b> | 0.0000        | 0.0000        | <b>0.0000</b> |
| 9      | Other viral           | Other bacterial | Survive - antibiotic prescribed    | 1.79%          | \$0.00           | \$0.00                | \$0.06          | \$0.04         | <b>\$0.10</b> | 0.0000        | 0.0000        | <b>0.0000</b> |
| 10     | Other viral           | Other viral     | Survive - no antibiotic prescribed | 2.36%          | \$0.00           | \$0.00                | \$0.00          | \$0.00         | <b>\$0.00</b> | 0.0000        | 0.0000        | <b>0.0000</b> |
| 11     | Other bacterial cause | Other bacterial | Survive - antibiotic prescribed    | 11.16%         | \$0.00           | \$0.00                | \$0.37          | \$0.28         | <b>\$0.64</b> | 0.0000        | 0.0000        | <b>0.0000</b> |
| 12     | Other bacterial cause | Other viral     | Survive - no antibiotic prescribed | 4.74%          | \$0.00           | \$0.00                | \$0.00          | \$0.00         | <b>\$0.00</b> | 0.0000        | 0.0000        | <b>0.0000</b> |
|        |                       |                 |                                    | <b>100.00%</b> | <b>\$0.00</b>    | <b>\$7.93</b>         | <b>\$0.76</b>   | <b>\$1.21</b>  | <b>\$9.90</b> | <b>0.0194</b> | <b>0.0089</b> | <b>0.0282</b> |

Percentage receiving antibiotics 31.51%  
Inappropriate antibiotics 20.02%

**Intervention:** Novel multiplex + clinical assessment

| Branch | True disease          | Diagnosis       | Outcome                            | Probability    | Diagnostic costs | Hospitalisation costs | Treatment costs | Societal costs | Total costs   | YLD           | YLL           | DALYs         |
|--------|-----------------------|-----------------|------------------------------------|----------------|------------------|-----------------------|-----------------|----------------|---------------|---------------|---------------|---------------|
| 1      | Enteric fever         | Enteric fever   | Survive                            | 2.15%          | \$0.11           | \$0.39                | \$0.04          | \$0.10         | <b>\$0.63</b> | 0.0160        | 0.0000        | <b>0.0160</b> |
| 2      | Enteric fever         | Enteric fever   | Die                                | 0.02%          | \$0.00           | \$0.00                | \$0.00          | \$0.00         | <b>\$0.00</b> | 0.0001        | 0.0065        | <b>0.0066</b> |
| 3      | Enteric fever         | Other           | Survive                            | 0.38%          | \$0.02           | \$0.11                | \$0.01          | \$0.01         | <b>\$0.15</b> | 0.0029        | 0.0000        | <b>0.0029</b> |
| 4      | Enteric fever         | Other           | Die                                | 0.00%          | \$0.00           | \$0.00                | \$0.00          | \$0.00         | <b>\$0.00</b> | 0.0000        | 0.0015        | <b>0.0016</b> |
| 5      | Dengue                | Dengue          | Survive - observed in hospital     | 10.56%         | \$0.53           | \$1.09                | \$0.00          | \$0.00         | <b>\$1.62</b> | 0.0000        | 0.0000        | <b>0.0000</b> |
| 6      | Dengue                | Other           | Survive - not observed in hospital | 1.86%          | \$0.09           | \$0.00                | \$0.00          | \$0.00         | <b>\$0.09</b> | 0.0000        | 0.0000        | <b>0.0000</b> |
| 7      | Other viral           | Enteric fever   | Survive                            | 3.46%          | \$0.17           | \$0.24                | \$0.06          | \$0.16         | <b>\$0.63</b> | 0.0000        | 0.0000        | <b>0.0000</b> |
| 8      | Other viral           | Dengue          | Survive                            | 3.46%          | \$0.17           | \$0.36                | \$0.00          | \$0.00         | <b>\$0.53</b> | 0.0000        | 0.0000        | <b>0.0000</b> |
| 9      | Other viral           | Other bacterial | Survive - antibiotic prescribed    | 9.95%          | \$0.50           | \$0.00                | \$0.33          | \$0.25         | <b>\$1.07</b> | 0.0000        | 0.0000        | <b>0.0000</b> |
| 10     | Other viral           | Other viral     | Survive - no antibiotic prescribed | 52.25%         | \$2.61           | \$0.00                | \$0.00          | \$0.00         | <b>\$2.61</b> | 0.0000        | 0.0000        | <b>0.0000</b> |
| 11     | Other bacterial cause | Other bacterial | Survive - antibiotic prescribed    | 11.77%         | \$0.59           | \$0.00                | \$0.39          | \$0.29         | <b>\$1.27</b> | 0.0000        | 0.0000        | <b>0.0000</b> |
| 12     | Other bacterial cause | Other viral     | Survive - no antibiotic prescribed | 4.13%          | \$0.21           | \$0.00                | \$0.00          | \$0.00         | <b>\$0.21</b> | 0.0000        | 0.0000        | <b>0.0000</b> |
|        |                       |                 |                                    | <b>100.00%</b> | <b>\$5.00</b>    | <b>\$2.20</b>         | <b>\$0.81</b>   | <b>\$0.81</b>  | <b>\$8.82</b> | <b>0.0191</b> | <b>0.0080</b> | <b>0.0271</b> |

Percentage receiving antibiotics 27.34%  
Inappropriate antibiotics 13.69%

# Model Results

Introduction

Settings

Results

SA Settings

DSA Results

PSA Results

## Cost-Effectiveness Results

|                     | Diagnostic costs | Hospitalisation costs | Treatment costs | Societal costs | Total Costs   | YLD    | YLL    | DALYs         | % of cases correctly diagnosed | % of patients prescribed antibiotics |
|---------------------|------------------|-----------------------|-----------------|----------------|---------------|--------|--------|---------------|--------------------------------|--------------------------------------|
| Clinical assessment | \$0.00           | \$7.93                | \$0.76          | \$1.21         | <b>\$9.90</b> | 0.0194 | 0.0089 | <b>0.0282</b> | 32.88%                         | 31.51%                               |
| Multiplex LF-RDT    | \$5.00           | \$2.20                | \$0.81          | \$0.81         | <b>\$8.82</b> | 0.0191 | 0.0080 | <b>0.0271</b> | 90.84%                         | 27.34%                               |

## Incremental Results

|                                          | Diagnostic costs | Hospitalisation costs | Treatment costs | Societal costs | Total Costs    | YLD    | YLL    | DALYs averted | % of cases correctly diagnosed | % of patients prescribed antibiotics | ICER (\$/DALY averted) |
|------------------------------------------|------------------|-----------------------|-----------------|----------------|----------------|--------|--------|---------------|--------------------------------|--------------------------------------|------------------------|
| Multiplex LF-RDT vs. Clinical assessment | \$5.00           | -\$5.74               | \$0.05          | -\$0.40        | <b>-\$1.08</b> | 0.0003 | 0.0009 | <b>0.0012</b> | 57.96%                         | -4.16%                               | -\$940.95              |

I



# Scenario Analyses

Run Scenario

Introduction

Settings

Results

SA Settings

DSA Results

PSA Results

## Sensitivity and Specificity Scenario Analyses

| Dengue multiplex |             |        |                                |
|------------------|-------------|--------|--------------------------------|
| Sensitivity      | Specificity | NMB    | Threshold cost-effective price |
| 0.9              | 0.6         | \$1.42 | \$6.42                         |
| 0.8              | 0.7         | \$2.05 | \$7.05                         |
| 0.7              | 0.8         | \$2.69 | \$7.69                         |
| 0.6              | 0.9         | \$3.33 | \$8.33                         |

NMB \$1.49

| Enteric fever multiplex |             |         |                                |
|-------------------------|-------------|---------|--------------------------------|
| Sensitivity             | Specificity | NMB     | Threshold cost-effective price |
| 0.9                     | 0.6         | -\$5.08 | -\$0.08                        |
| 0.8                     | 0.7         | -\$2.71 | \$2.29                         |
| 0.7                     | 0.8         | -\$0.34 | \$4.66                         |
| 0.6                     | 0.9         | \$2.03  | \$7.03                         |

| CRP multiplex |             |         |                                |
|---------------|-------------|---------|--------------------------------|
| Sensitivity   | Specificity | NMB     | Threshold cost-effective price |
| 0.9           | 0.6         | -\$0.04 | \$4.96                         |
| 0.8           | 0.7         | \$1.44  | \$6.44                         |
| 0.7           | 0.8         | \$2.91  | \$7.91                         |
| 0.6           | 0.9         | \$4.39  | \$9.39                         |

| All 3 tests |             |         |                                |
|-------------|-------------|---------|--------------------------------|
| Sensitivity | Specificity | NMB     | Threshold cost-effective price |
| 0.9         | 0.6         | -\$8.03 | -\$3.03                        |
| 0.8         | 0.7         | -\$4.83 | \$0.17                         |
| 0.7         | 0.8         | -\$1.09 | \$3.91                         |
| 0.6         | 0.9         | \$3.17  | \$8.17                         |
